# Supplementary material for: Modulating the polyamine/hypusine axis controls generation of CD8+ tissue-resident memory T cells
Source: PubMed Central journal article supplement (PMC10561731; doi:10.1172/jci.insight.169308), 2023-09-22
Supplement: jciinsight-8-169308-s159.pdf [file jciinsight-8-169308-s159.pdf]

## Supplemental Figure 1

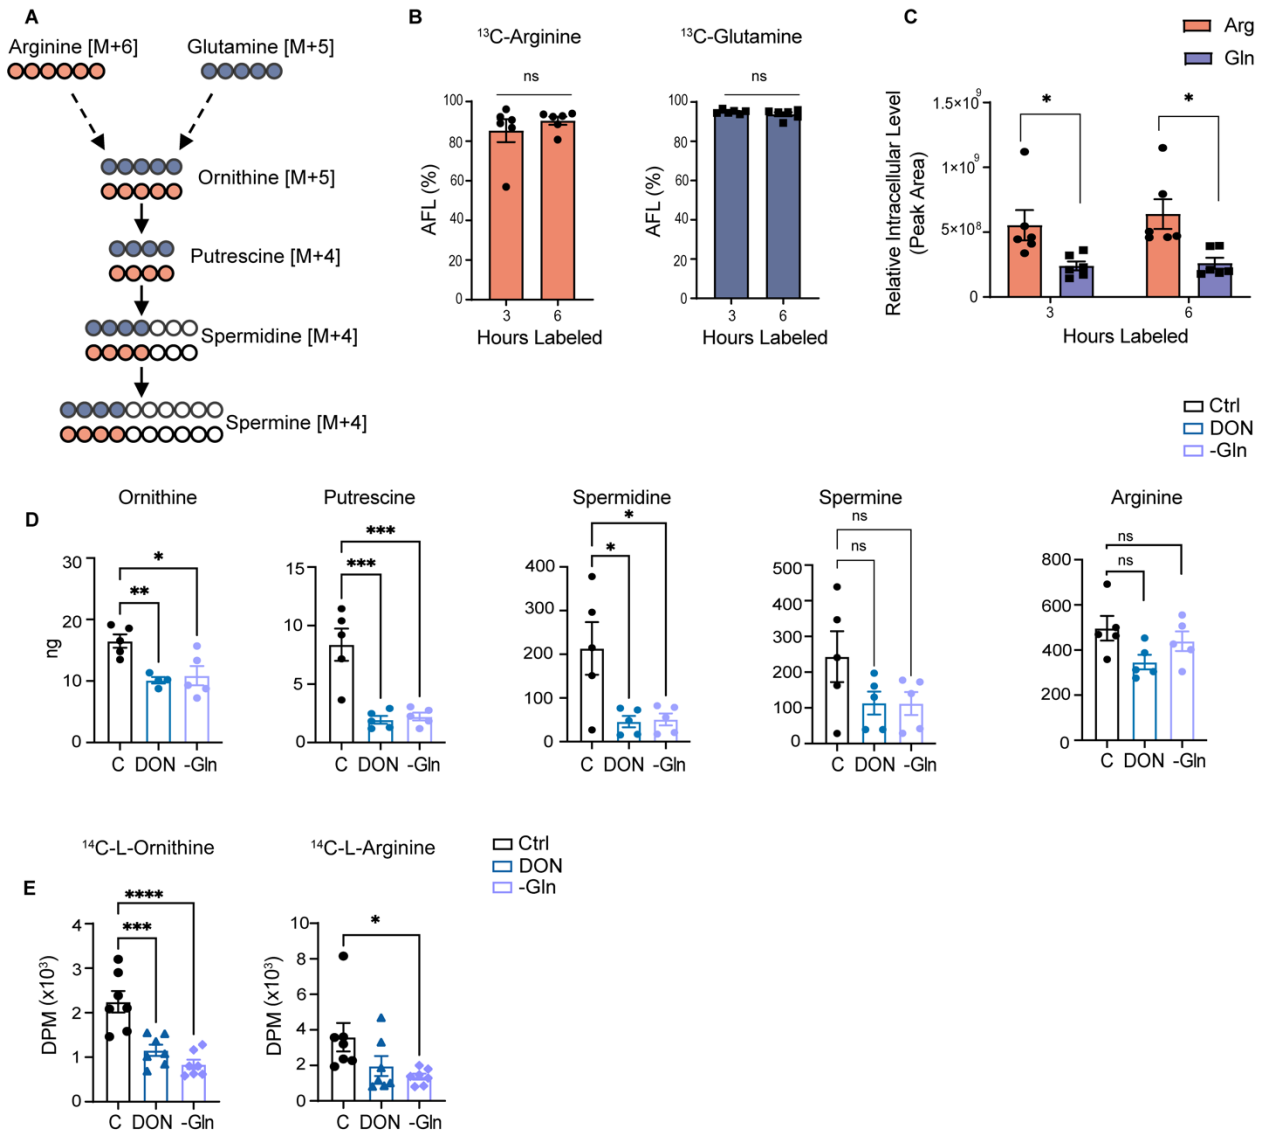

**Supplemental Figure 1. Glutamine catabolism primarily drives polyamine biosynthesis in antigen activated CD8<sup>+</sup> T cells.** (A) Isotope labeling strategy assessing the production of polyamines from glutamine or arginine in antigen-activated mouse OT-I CD8<sup>+</sup> T cells. (B) Complete labeling of CD8<sup>+</sup> T cells with  $^{13}\text{C}$ -glutamine or  $^{13}\text{C}$ -arginine ( $n = 6$ ). (C) Relative intracellular levels (peak area) of  $^{13}\text{C}$ -glutamine or  $^{13}\text{C}$ -arginine at 3 and 6 hours of labeling ( $n = 6$ ). (D) Levels of intracellular ornithine, putrescine, spermidine, spermine and arginine were determined by liquid chromatography-mass spectrometry in OT-I T cells activated in the presence of DON or in glutamine deficient media ( $n = 5$ ). Uptake of (E)  $^{14}\text{C}$ -L-ornithine and  $^{14}\text{C}$ -L-arginine in OT-I T cells activated in the presence of DON or in glutamine deficient media ( $n = 7$ ). Data in (B) were analyzed by unpaired t-test and data in (C) were analyzed two-way ANOVA. Data in (D,E) were analyzed using one-way ANOVA and Dunnett multiple comparisons. Each dot represents a biologically independent replicate and data are mean  $\pm$  SEM (\*,  $P < 0.05$ ; \*\*,  $P < 0.01$ ; \*\*\*,  $P < 0.001$ ; \*\*\*\*,  $P < 0.0001$ ).

**Supplemental Figure 2**

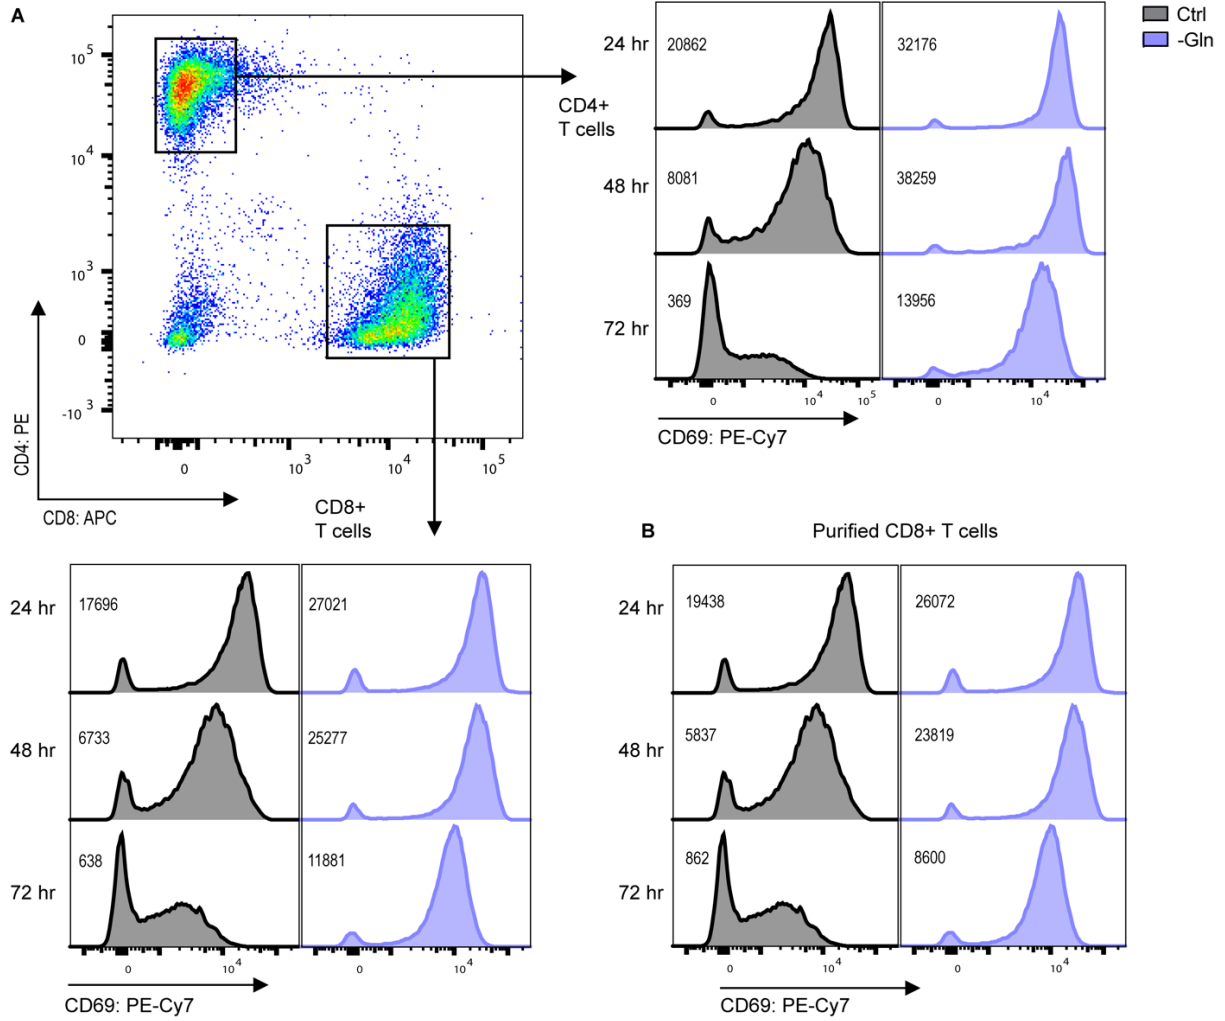

**Supplemental Figure 2. Representative histograms of CD69 expression in activated polyclonal T cells and purified CD8<sup>+</sup> T cells under glutamine deficient conditions.** Representative FACS plots of (A) polyclonal CD4<sup>+</sup> and CD8<sup>+</sup> T cells, and (B) purified CD8<sup>+</sup> T cells, at 24-, 48- and 72-hours post-activation, when cultured in glutamine-replete (Ctrl) vs. glutamine-deficient (-Gln) media.

### Supplemental Figure 3

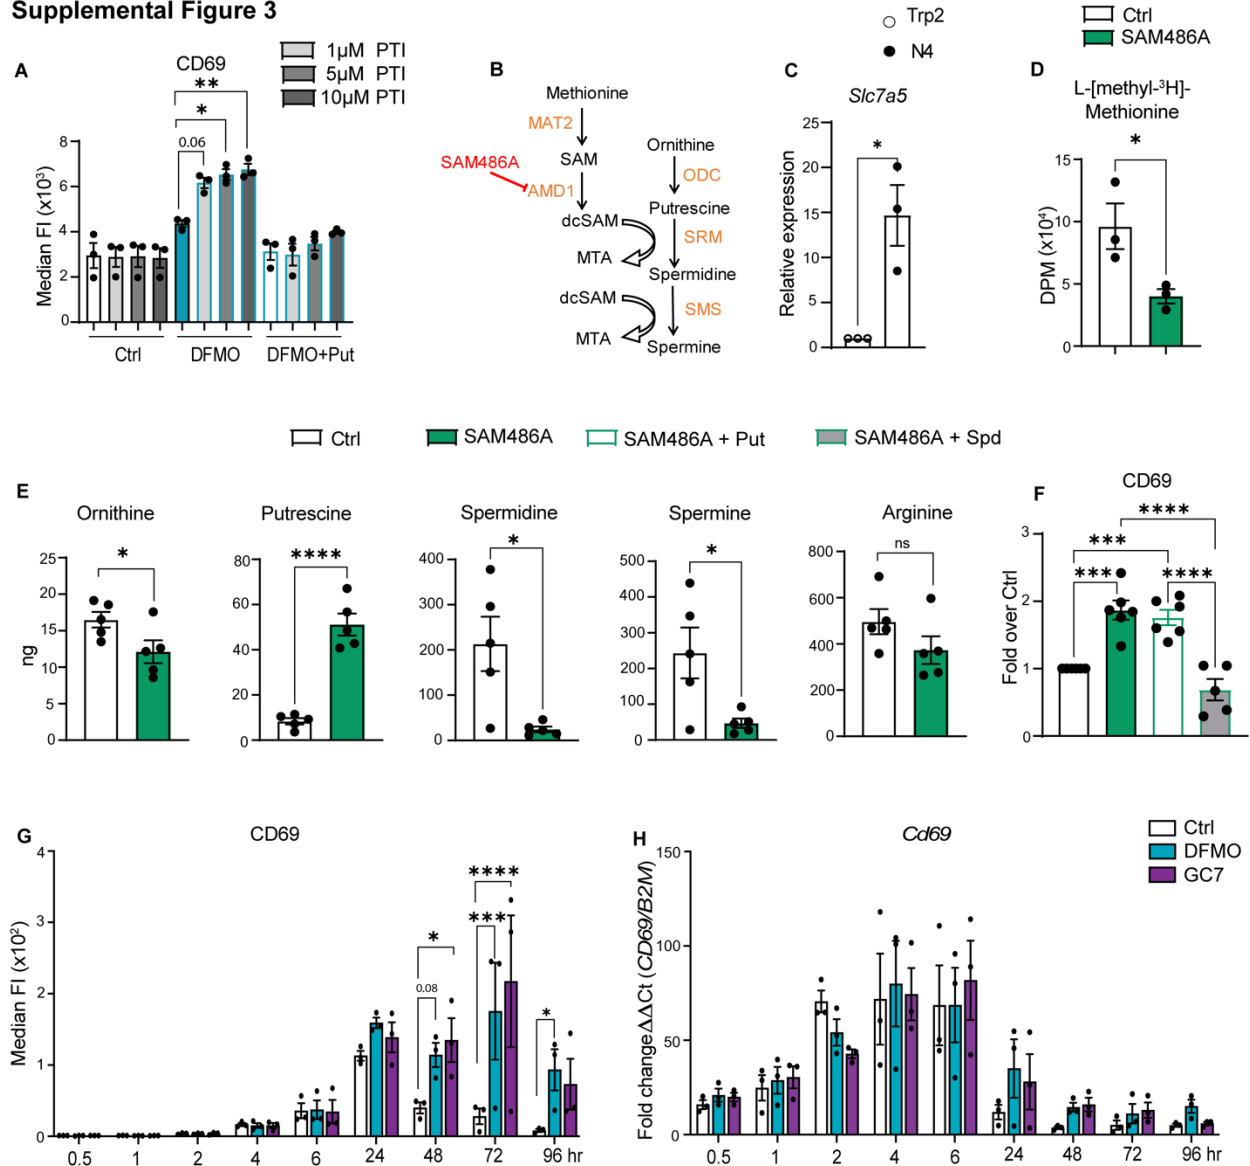

**Supplemental Figure 3. Polyamine transport inhibitor augments DFMO-induced increases in CD69 and effects of DFMO and GC7 treatment on CD69 cell surface vs. mRNA levels.** (A) CD69 median fluorescence (FI) in OT-I CD8<sup>+</sup> T cells activated without (Ctrl) or with added DFMO (5 mM)  $\pm$  Put (500  $\mu$ M) and increasing concentrations (0, 1, 5 and 10  $\mu$ M) of the polyamine transport inhibitor (PTI) Trimer44NMe ( $n = 3$ ). (B) Schematic of metabolic pathway connecting methionine to the polyamines. (C) Fold change in levels of *Slc7a5* mRNA (determined by qRT-PCR) normalized to *B2m* mRNA ( $n = 3$ ). (D) Uptake of L-[methyl- $^3$ H]-methionine as DPM ( $n = 3$ ). (E) Intracellular levels of ornithine, putrescine, spermidine, spermine and arginine were determined by LC-MS in OT-I T cells activated  $\pm$  10  $\mu$ M SAM486A ( $n = 5$ ). (F) Fold over Ctrl of median FI of CD69 in OT-I T cells activated in the presence of 10  $\mu$ M SAM486A  $\pm$  500  $\mu$ M Put or 100  $\mu$ M Spd ( $n = 6$ ). (G, H) Polyclonal CD8<sup>+</sup> T cells T cells were activated without (Ctrl) or with added DFMO (5 mM) or GC-7 (10  $\mu$ M) ( $n = 3$ ). At the indicated intervals, cells were harvested and analyzed for (G) CD69 cell surface expression by flow cytometry or (H) *CD69* mRNA levels by qRT-PCR. *CD69* mRNA expression was normalized to levels of *B2m* mRNA. Data in (A) were analyzed using one-way ANOVA with Tukey's post-hoc test. Data in (C, E) were analyzed using unpaired t-test and data in (F) were analyzed using one-way

ANOVA with Dunnett multiple comparisons. Data in **(G, H)** were analyzed using two-way ANOVA and Dunnett multiple comparisons. Each dot represents a biological replicate, and all data are mean  $\pm$  SEM, (\*,  $P < 0.05$ ; \*\*,  $P < 0.01$ ; \*\*\*,  $P < 0.001$ ; \*\*\*\*,  $P < 0.0001$ ).

### Supplemental Figure 4

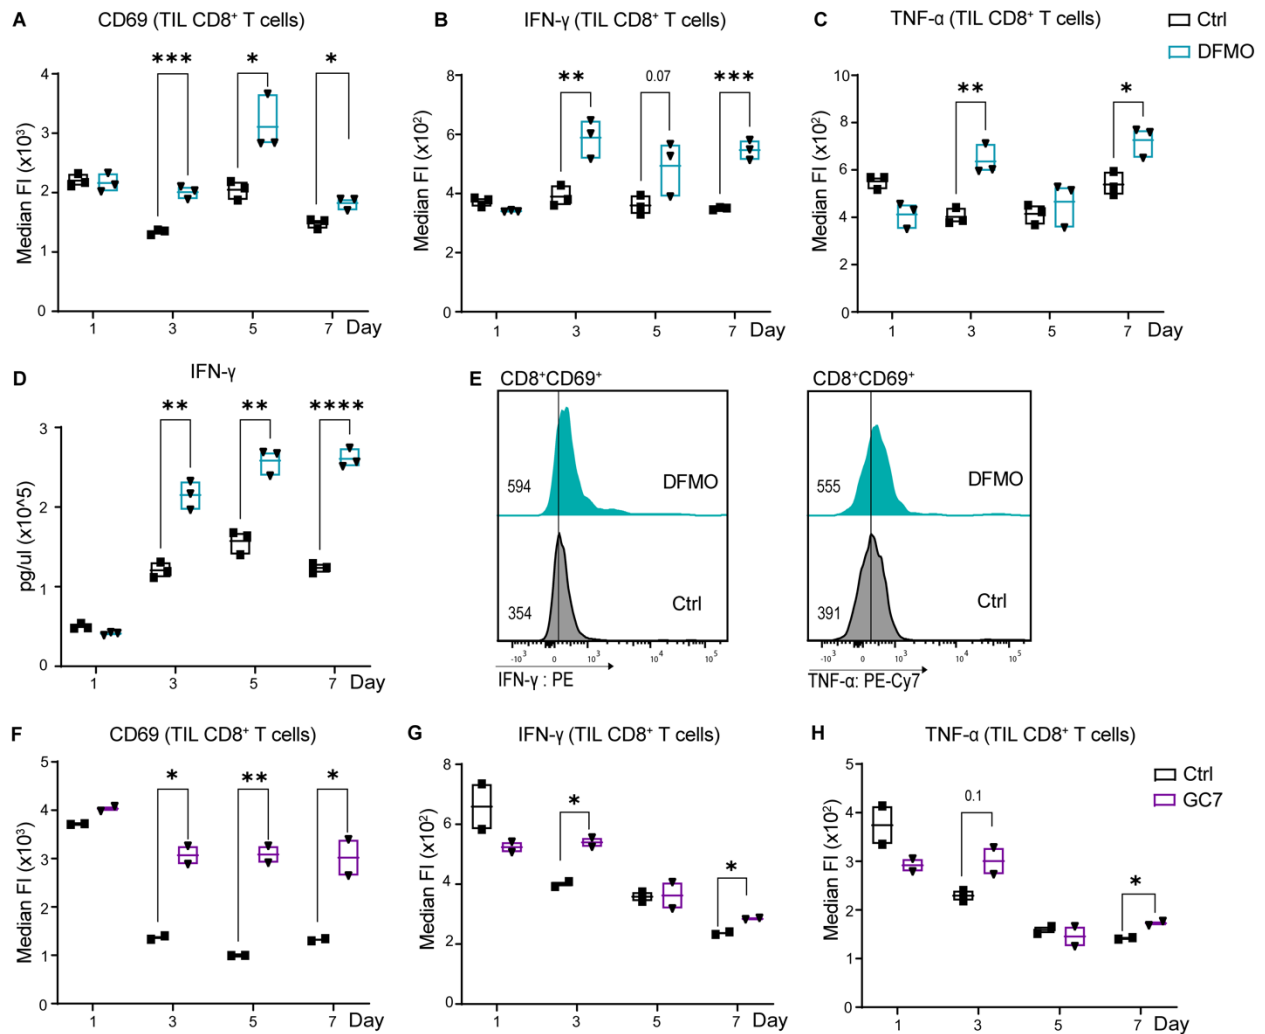

**Supplemental Figure 4. Inhibition of the polyamine-hypusine axis controls CD69 expression and IFN- $\gamma$  and TNF- $\alpha$  production in human sarcoma TIL CD8<sup>+</sup> T cells.** Median FI of (A) CD69, (B) IFN- $\gamma$  and (C) TNF- $\alpha$  in anti-CD3/CD28-activated sarcoma TIL CD8<sup>+</sup> T cells treated without (Ctrl) or with 5 mM DFMO for the indicated intervals. (D) IFN- $\gamma$  ELISA from human sarcoma activated TIL CD8<sup>+</sup> T cells (Ctrl) or TIL treated with 5 mM DFMO for the indicated intervals. (E) Flow plots of IFN- $\gamma$  (*left*) and TNF- $\alpha$  (*right*) levels from activated CD69<sup>+</sup> CD8<sup>+</sup> TILs (Ctrl) or TIL treated with 5 mM DFMO. Median FI of (F) CD69, (G) IFN- $\gamma$  (*left*) and (H) TNF- $\alpha$  in activated TIL CD8<sup>+</sup> T cells (Ctrl) or TIL treated with 10  $\mu$ M GC7 for the indicated intervals. All data are representative of 3 independent experiments and were analyzed using multiple t-tests and Holm-Šidák test. All data are mean  $\pm$  SD, (\*, P < 0.05; \*\*, P < 0.01; \*\*\*, P < 0.001; \*\*\*\*, P < 0.0001).

### Supplemental Figure 5

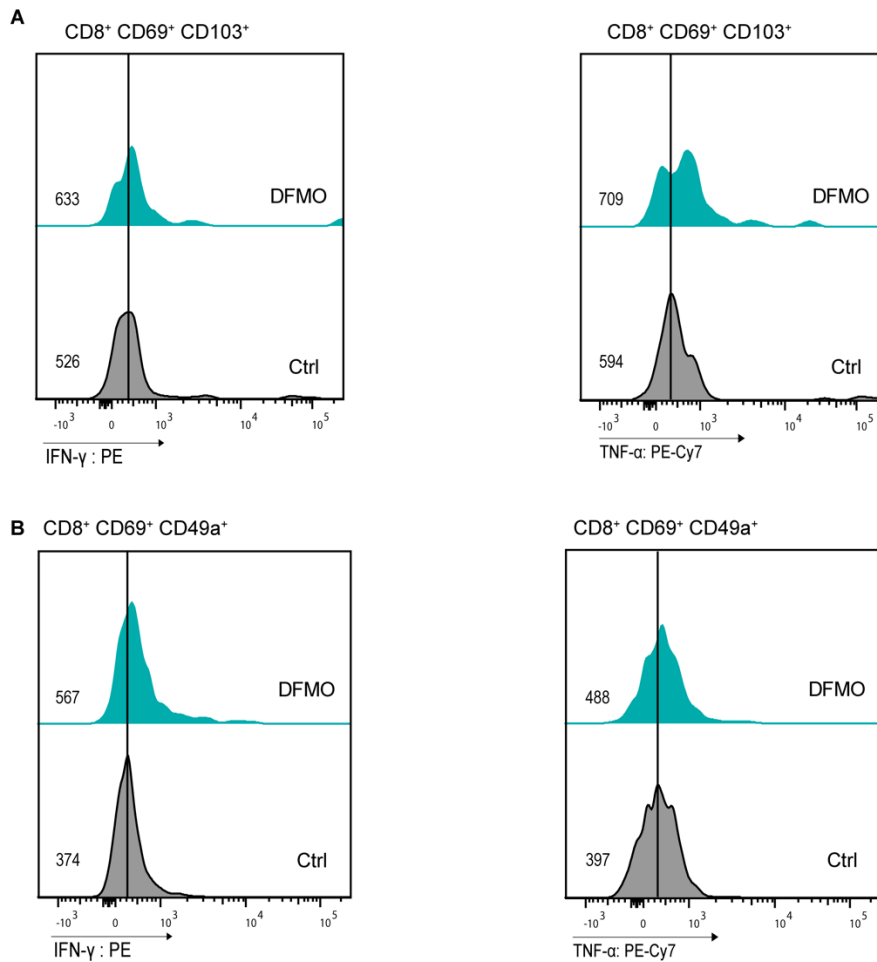

**Supplemental Figure 5. Blocking polyamine biosynthesis promotes the differentiation of T<sub>RM</sub>-like cells *ex vivo*.** (A) Flow cytometry analyses of levels of IFN- $\gamma$  (*left*) and TNF- $\alpha$  (*right*) in TGF- $\beta$ -treated, anti-CD3/CD28 activated mouse CD8<sup>+</sup> T cells (Ctrl) and in these cells treated with DFMO (5 mM). Levels of IFN- $\gamma$  and TNF- $\alpha$  were determined in CD69<sup>+</sup>CD103<sup>+</sup> CD8<sup>+</sup> T cells. (B) Flow cytometry analyses of levels of IFN- $\gamma$  and TNF- $\alpha$  in TGF- $\beta$ -treated, anti-CD3/CD28 activated human sarcoma CD8<sup>+</sup> TIL (Ctrl) and in these cells treated with DFMO (5 mM). Levels of IFN- $\gamma$  and TNF- $\alpha$  were determined in CD69<sup>+</sup>CD49a<sup>+</sup> CD8<sup>+</sup> T cells.

## Supplemental Figure 6

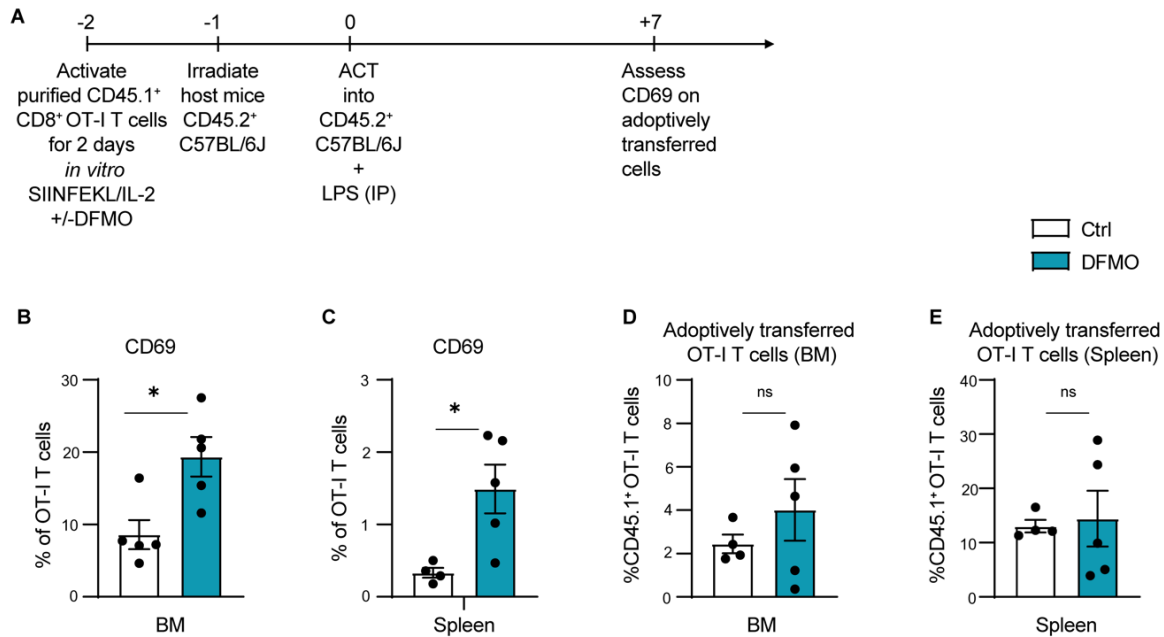

**Supplemental Figure 6. Inhibition of polyamine biosynthesis augments generation of bone marrow T<sub>RM</sub> after short-term ACT.** (A) Schematic of the experimental design of the short-term bone marrow T cell adoptive cell transfer (ACT) model. (B, C) After 7 days post ACT, mice were assessed for percentage of CD69<sup>+</sup> of CD45.1<sup>+</sup>CD8<sup>+</sup> OT-I T cells in the bone marrow (B) and spleen (C) of CD45.2<sup>+</sup> recipient mice ( $n = 5$ ). (D, E) Percentage of CD45.1<sup>+</sup>CD8<sup>+</sup> OT-I T cells in the bone marrow (D) and spleen (E) of CD45.2<sup>+</sup> recipient mice ( $n = 5$ ). All data were analyzed using unpaired t-test. Each dot represents a biological replicate, and all data are mean  $\pm$  SEM, (\*,  $P < 0.05$ ).

**Supplemental Table 1. Flow antibodies, dyes and reagents.**

| Reagent                                               | Source                 | Identifier                                          |
|-------------------------------------------------------|------------------------|-----------------------------------------------------|
| CD69, mouse, PE-CF594, PE-Cy7 or APC                  | Tonbo, Biolegend or BD | 60-0691, 104514 or 562455<br>Clone: H1.2F3          |
| CD8 $\alpha$ , mouse, BV711, FITC or BUV395           | Biolegend, Tonbo or BD | 100759, 35-1886, 565968<br>Clone:53-6.7             |
| CD4, mouse, BV510                                     | Biolegend              | 100553<br>Clone: RM4-5                              |
| CD103, mouse, BV785, PE or BV421                      | Biolegend, BD          | 121439, 557495, 562771<br>Clone:2E7, M290           |
| Ly6C, mouse, APC                                      | Biolegend              | 128016<br>Clone:HK1.4                               |
| CXCR6, mouse, PE/Dazzele                              | Biolegend              | 151117<br>Clone:SA051D1                             |
| CD45.1, mouse, PerCP/Cy5.5                            | Biolegend              | 110728<br>Clone:A20                                 |
| Bcl-2, mouse, AF647                                   | Biolegend              | 633510<br>Clone: BCL/10C4                           |
| CD8 $\alpha$ , human, FITC, BUV737 or BV711           | Tonbo, BD or Biolegend | 35-0089, 612755, 301044<br>Clone:hit8a, SK1, RPA-T8 |
| CD69, human, BV605, APC/Cy7 or FITC                   | Biolegend              | 310938, 310904, 310914<br>Clone:FN50                |
| CD3, human, BV711                                     | Biolegend              | 317328<br>Clone:OKT3                                |
| CD103, human, APC                                     | BD                     | 563883<br>Clone:Ber-ACT8                            |
| CD49a, human, APC/Fire750                             | Biolegend              | 328318<br>Clone:TS2/7                               |
| IFN- $\gamma$ , human, PE                             | BD                     | 554701                                              |
| TNF- $\alpha$ , human, PE-Cy7                         | Biolegend              | 502930<br>Clone:MAb11                               |
| BCL2, human, AF647                                    | Biolegend              | 563600<br>Clone:Bcl-2/100                           |
| Granzyme B, human, AF700                              | Biolegend              | 372222<br>Clone:QA16A02                             |
| Perforin, human, BV510                                | Biolegend              | 308120<br>Clone:dG9                                 |
| DAPI (4',6-Diamidino-2-Phenylindole, Dihydrochloride) | Thermo Fisher          | #D1306                                              |
| Ghost Dye Red 780                                     | Tonbo                  | #13-0865-T500                                       |
| Brefeldin A                                           | Invitrogen             | #4506-51                                            |
| BD Cytotfix/Cytoperm™                                 | BD                     | #554714                                             |



**Supplemental Table 2. Key resources.**

| Reagent                                              | Source                 | Identifier                           |
|------------------------------------------------------|------------------------|--------------------------------------|
| OVA (257-264)                                        | Anaspec                | #AS-60193-1                          |
| Trp2 (180-188)                                       | Anaspec                | #AS-61058                            |
| Recombinant Murine IL-2                              | Peprtech               | #212-12                              |
| <sup>13</sup> C5-glutamine                           | Cambridge Isotope Labs | # CLM-1822-H                         |
| <sup>13</sup> C6-arginine                            | Cambridge Isotope Labs | # CLM-2265-H                         |
| <sup>13</sup> C5-L-proline                           | Cambridge Isotope Labs | # CLM-2260-H-PK                      |
| <sup>13</sup> C5-L-methionine                        | Cambridge Isotope Labs | # CNLM-759-H-PK                      |
| L-[ <sup>14</sup> C(U)]-arginine                     | Perkin Elmer           | #NEC267E050UC                        |
| L-[ <sup>14</sup> C(U)]-glutamine                    | Perkin Elmer           | #NEC451050UC                         |
| L-[1- <sup>14</sup> C]-ornithine                     | Perkin Elmer           | #NEC710250UC                         |
| L-[methyl- <sup>3</sup> H]-methionine                | Perkin Elmer           | #NET061X                             |
| dimethyl- $\alpha$ -ketoglutarate (DM $\alpha$ -KG)  | TCI America            | 13192-04-6<br>#K0013                 |
| L-ornithine monohydrochloride                        | Sigma                  | #O2375                               |
| Putrescine                                           | Sigma                  | #P5780                               |
| Spermidine                                           | Sigma                  | #S2626                               |
| Spermine                                             | Sigma                  | #S3256                               |
| Dimethyl DL-glutamate hydrochloride                  | TCI America            | 13515-99-6<br>#D3305                 |
| difluoromethylornithine (DFMO)                       | Dr. Patrick M. Woster  | Medical University of South Carolina |
| GC7                                                  | Sigma                  | #259545                              |
| N $\omega$ -hydroxy-nor-L-arginine (nor-NOHA)        | Sigma                  | #189302-40-7                         |
| 6-Diazo-5-oxo-L-norleucine (DON)                     | Sigma                  | #D2141-5MG                           |
| SAM486A or sardomozide                               | MedChemExpress         | #HY-13746B                           |
| rhTGF- $\beta$ 1                                     | R and D Systems        | #240-B/CF                            |
| rmTGF- $\beta$ 1                                     | R and D Systems        | #7666-MB                             |
| Murine IL-2                                          | Peprtech               | #212-12                              |
| Human IL-2                                           | Peprtech               | #200-02                              |
| Dynabeads <sup>TM</sup> Mouse T-Activator CD3/CD28   | Gibco                  | 11453D                               |
| Dynabeads <sup>TM</sup> Human T-Activator CD3/CD28   | Gibco                  | 11131D                               |
| Power SYBR <sup>TM</sup> Green PCR Master Mix        | Thermo Fisher          | #4367659                             |
| Lipopolysaccharide (LPS) from <i>E. coli</i> O111:B4 | Sigma                  | L5293                                |
| RPMI 1640 Medium                                     | Thermo Fisher          | #11875                               |
| [-Gln] RPMI 1640 Medium                              | Thermo Fisher          | #21870-076                           |
| SILAC DMEM flex media                                | Thermo Fisher          | #A2493901                            |

**Supplemental Table 3. Human samples and kits.**

| Human samples                                 | Source                                                            | Identifier   |
|-----------------------------------------------|-------------------------------------------------------------------|--------------|
| Human PBMCs                                   | One Blood, St Petersburg, FL<br>Lifesouth community blood centers | NA           |
| Kits                                          | Source                                                            | Identifier   |
| LEGEND MAX™ Mouse IFN- $\gamma$ ELISA Kit     | Biologend                                                         | #430107      |
| Pan T cell Isolation Kit II, mouse            | Miltenyi                                                          | #130-095-130 |
| CD8a <sup>+</sup> T cell Isolation Kit, mouse | Miltenyi                                                          | #130-104-075 |
| CD8a <sup>+</sup> T cell Isolation Kit, human | Miltenyi                                                          | #130-096-495 |
| RNeasy Plus Mini Kit                          | Qiagen                                                            | #74134       |

**Supplemental Table 4. qRT-PCR primers**

| Gene                    | Sequence 5'-3'          |
|-------------------------|-------------------------|
| <i>Slc1a5</i> Forward   | CTGCCTGTGAAGGACATCTCCT  |
| <i>Slc1a5</i> Reverse   | CTCGGCATCTTGGTTCGATCCA  |
| <i>Slc7a1</i> Forward   | TGGTCTTGTGCTTCATCGTG    |
| <i>Slc7a1</i> Reverse   | GACACCAGAGAATCCAAAGGG   |
| <i>Slc38a1</i> Forward  | TTACCAACCATCGCCTTC      |
| <i>Slc38a1</i> Reverse  | ATGAGAATGTCGCCTGTG      |
| <i>Slc38a2</i> Forward  | GGTATCTGAACGGTGACTATCTG |
| <i>Slc38a2</i> Reverse  | TCTGCGGTGCTATTGAATGC    |
| <i>Slc7A5</i> Forward   | GGTCTCTGTTACGTCCTCAAG   |
| <i>Slc7A5</i> Reverse   | GAACACCAGTGATGGCACAGGT  |
| <i>B2m</i> Forward      | TTCTGGTGCTTGTCTCACTGA   |
| <i>B2m</i> Reverse      | CAGTATGTTCCGGCTTCCATTC  |
| <i>Odc1</i> Forward     | GACGAGTTTGACTGCCACATC   |
| <i>Odc1</i> Reverse     | CGCAACATAGAACGCATCCTT   |
| <i>Oat</i> Forward      | GGAGTCCACACCTCAGTCG     |
| <i>Oat</i> Reverse      | CCACATCCCACATATAAATGCCT |
| <i>Aldh18a1</i> Forward | CGTCATCACAGACATCGTGGAG  |
| <i>Aldh18a1</i> Reverse | GGCTCTAAGGTAGCCAGCATTTC |
| <i>CD69</i> Forward     | GGGCTGTGTTAATAGTGGTCCTC |
| <i>CD69</i> Reverse     | CTTGCAAGGTAGCAACATGGTGG |
